# Supplementary material for: MCM10 compensates for Myc‐induced DNA replication stress in breast cancer stem‐like cells
Source: PubMed Central journal article supplement — Cancer Sci. 2021 Jan 22;112(3):1209–24. doi: 10.1111/cas.14776 (PMC7935783; doi:10.1111/cas.14776), 2021-01-22
Supplement: CAS-112-1209-s001.pdf [file CAS-112-1209-s001.pdf]

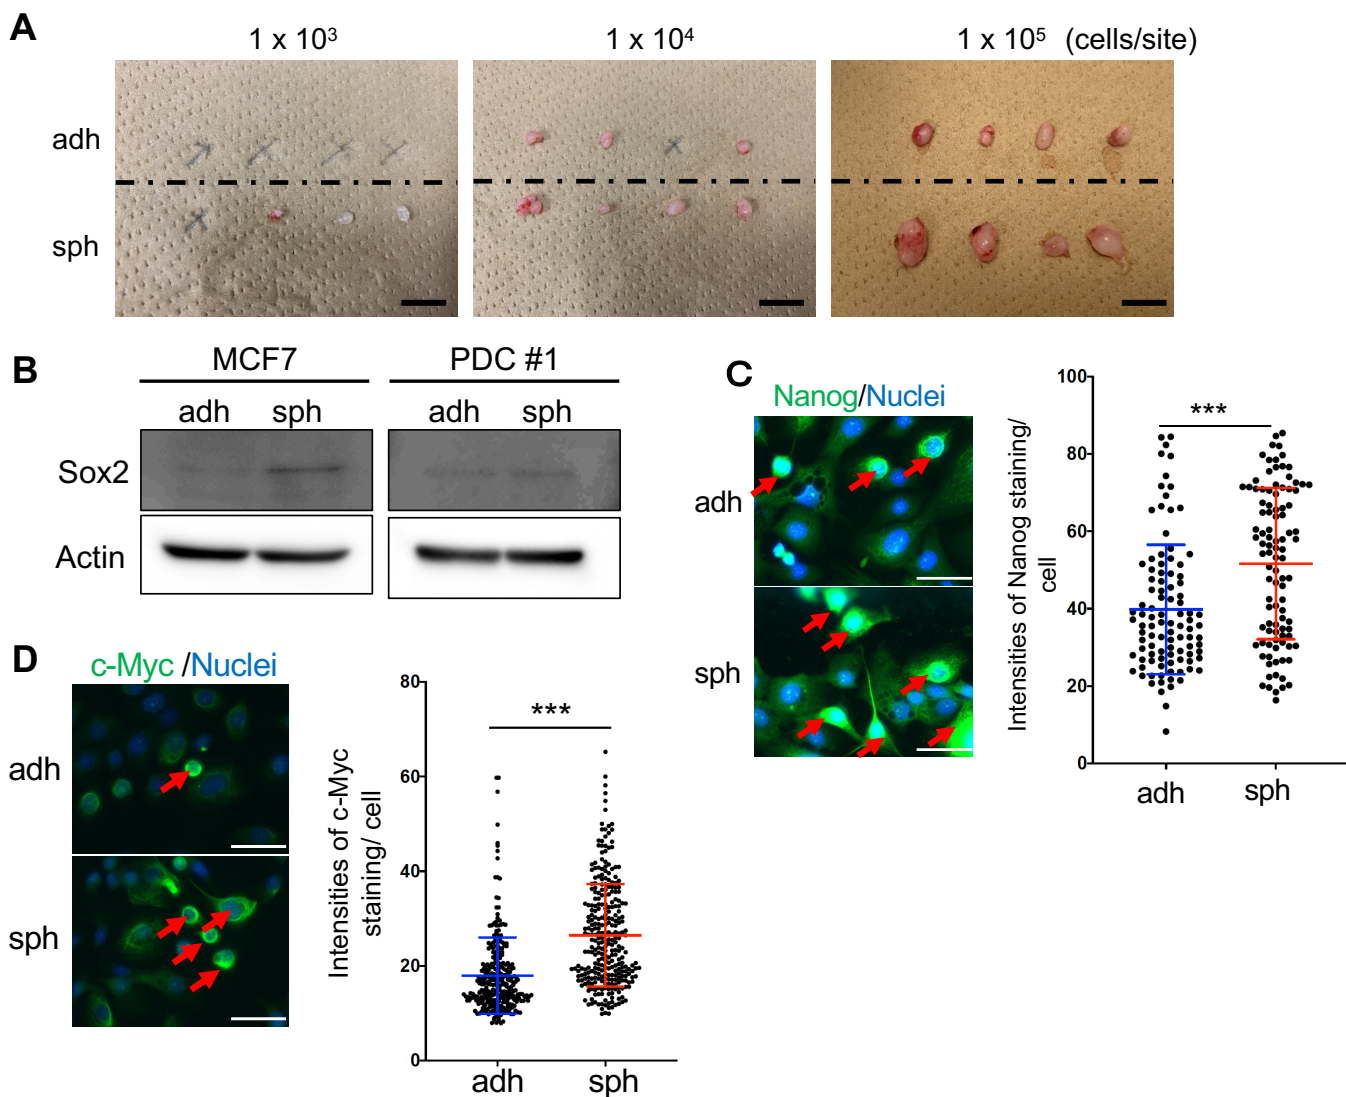

**Figure S1. CSCs are enriched in sphere culture population.** **A**, Representative images of tumors formed in the *in vivo* limiting dilution assay ( $1 \times 10^3$ ,  $10^4$  and  $10^5$  cells/site). Scale bar = 10 mm. **B**, Expression levels of Sox2 in MCF7 and PDC #1 cells were compared between cells cultured under adherent and sphere conditions. Actin was used for loading control. **C**, (Left) Immunofluorescence images of Nanog staining in PDC #1 cells cultured under adherent and sphere conditions are shown. Nuclei were counterstained with DAPI. Arrows indicate cells with strong Nanog staining. Scale bar = 50  $\mu$ m. (Right) The intensities of Nanog staining were quantified by using ImageJ software. One hundred cells in each slide were counted (mean  $\pm$ SD,  $n = 3$ ; \*\*\* $p < 0.001$ ). **D**, (Left) Immunofluorescence images of Myc staining in PDC #1 cells cultured under adherent and sphere conditions are shown. Nuclei were counterstained with DAPI. Arrows indicate cells with strong Myc staining. Scale bar = 50  $\mu$ m. (Right) The intensities of Myc staining were quantified by using ImageJ software. One hundred cells in each slide were counted (mean  $\pm$ SD,  $n = 3$ ; \*\*\* $p < 0.001$ ).

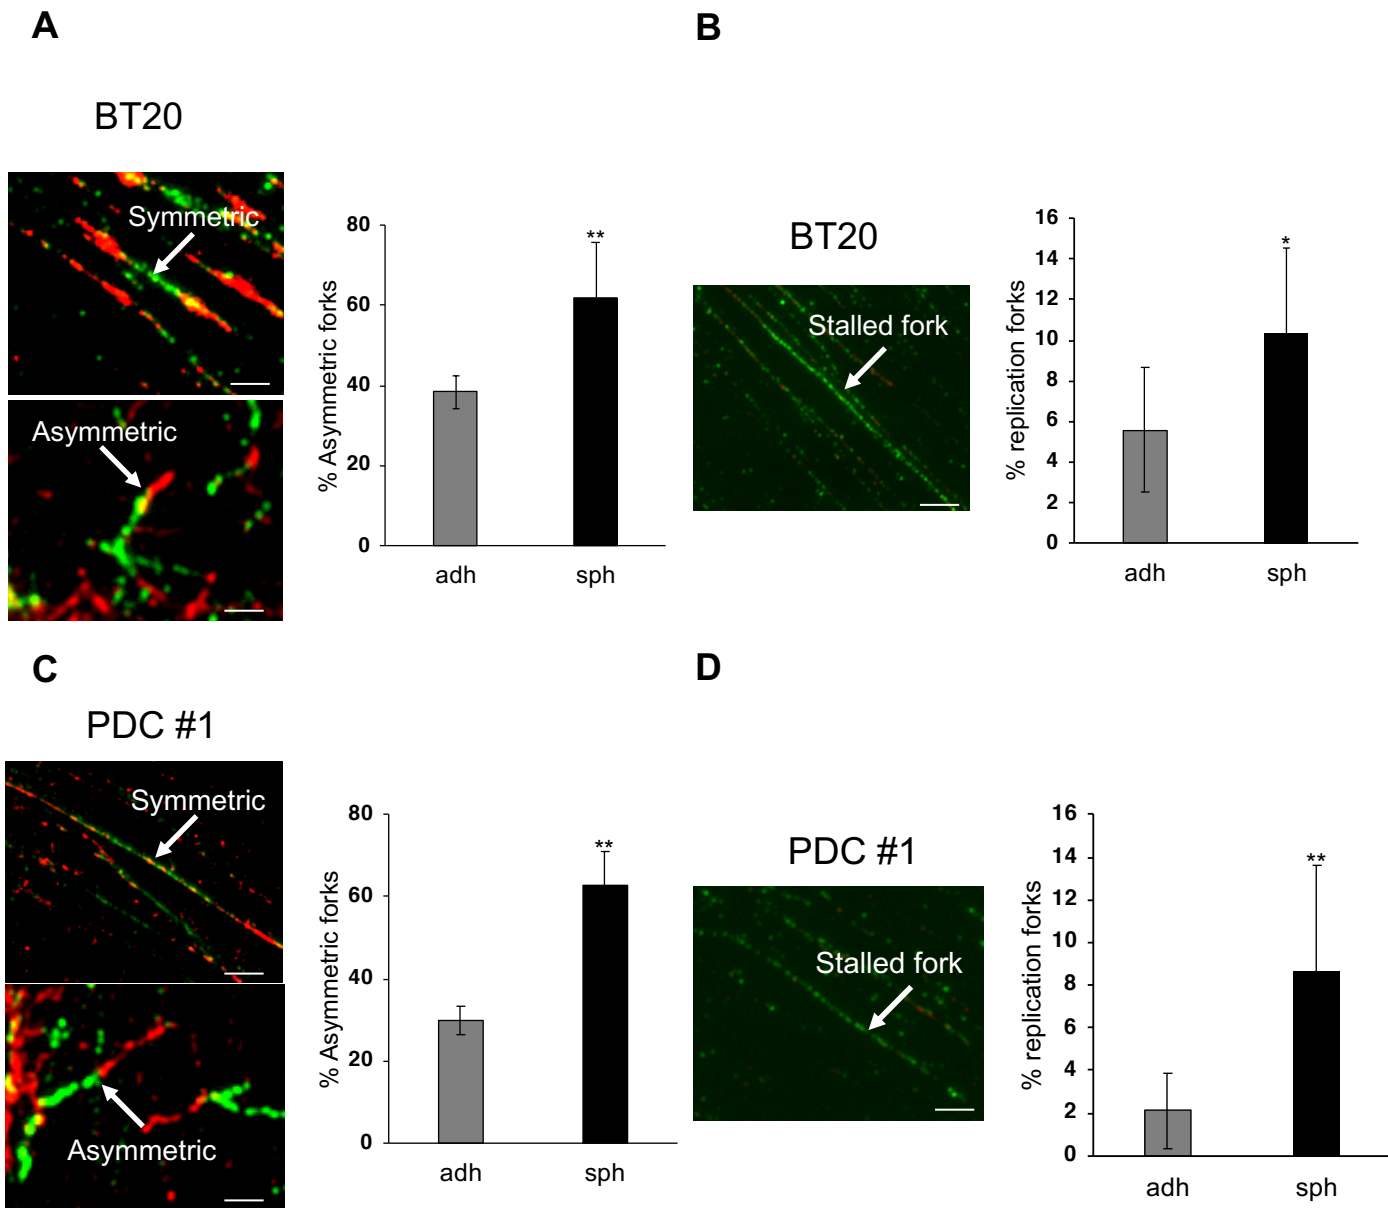

**Figure S2. DNA replication stress is upregulated in CSC-enriched spheroid cells.** **A,C**, Proportion of asymmetric forks, representative of replication stress. Thirty bidirectional forks in each slide were counted. Three slides for each population were prepared (mean  $\pm$  SEM,  $n = 3$ ;  $**p < 0.01$ ). Scale bar = 10  $\mu$ m. **B, D**, Proportion of stalled forks, labeled only with green was calculated. Two hundred labeled forks in each slide were counted. Three slides for each population were prepared (mean  $\pm$  SEM,  $n = 3$ ;  $**p < 0.01$ ). Scale bar = 5  $\mu$ m.

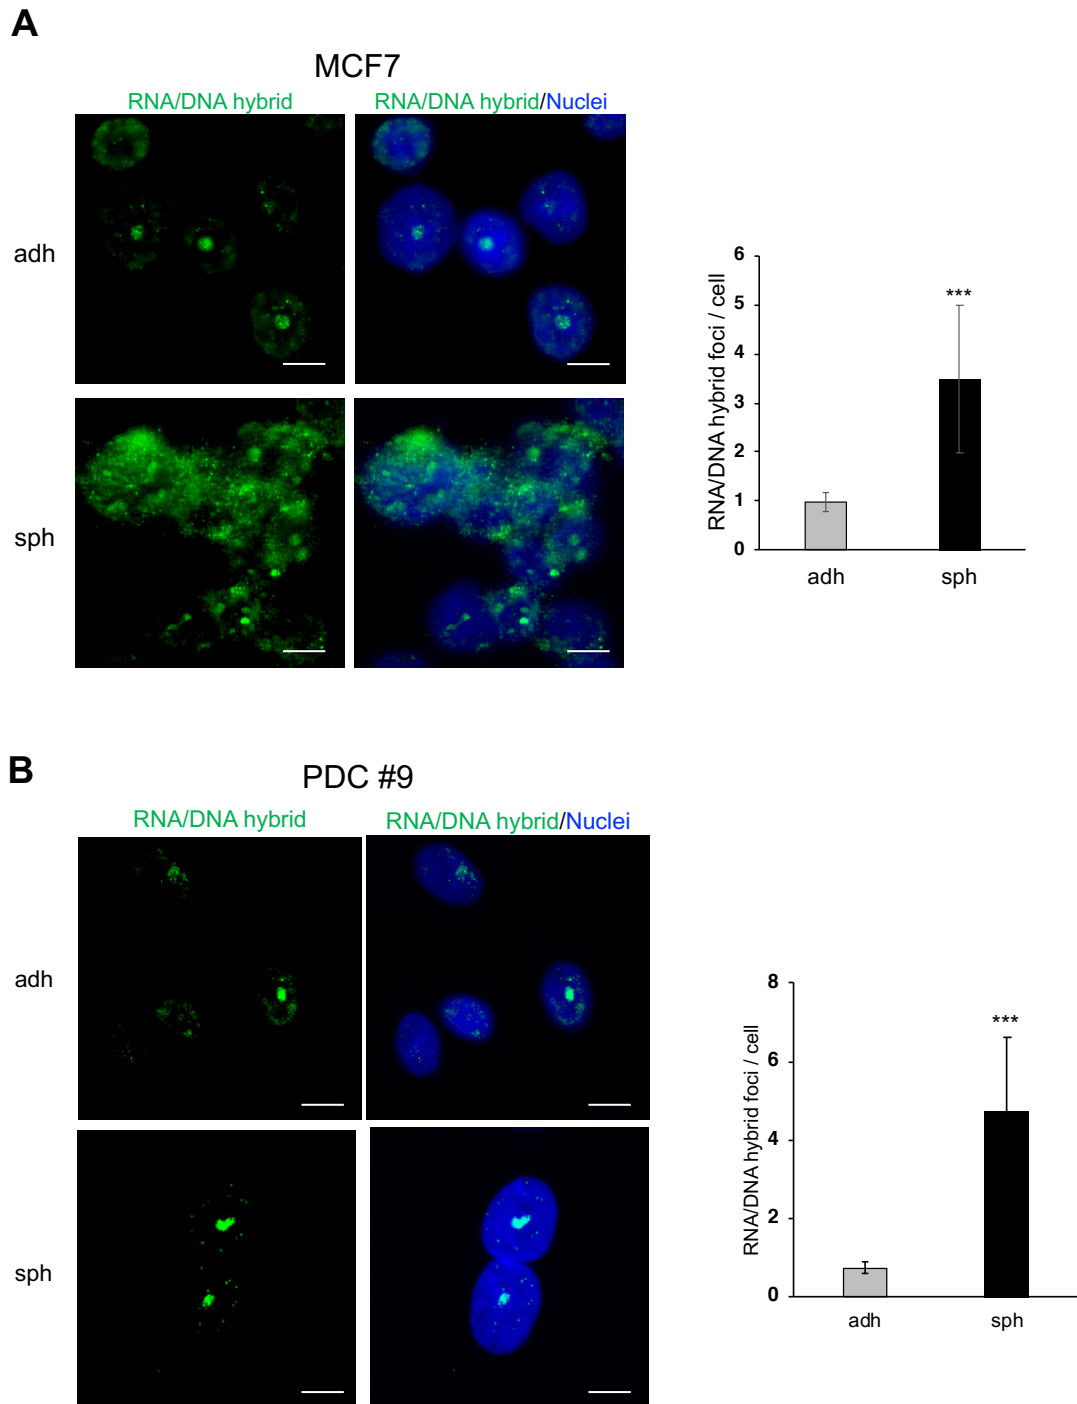

**Figure S3. RNA/DNA hybrid foci are increased in spheroid cells.** **A, B,** (Left) Immunofluorescence images of RNA/DNA hybrid staining in cells cultured in the adherent and sphere conditions are shown. (Right) Number of RNA/DNA hybrid foci in each cell was counted and compared between the two conditions. Hundred cells in each slide were counted. Three slides for each population were prepared (mean  $\pm$  SEM,  $n = 3$ ; \*\*\* $p < 0.001$ ). Scale bar = 10  $\mu$ m.

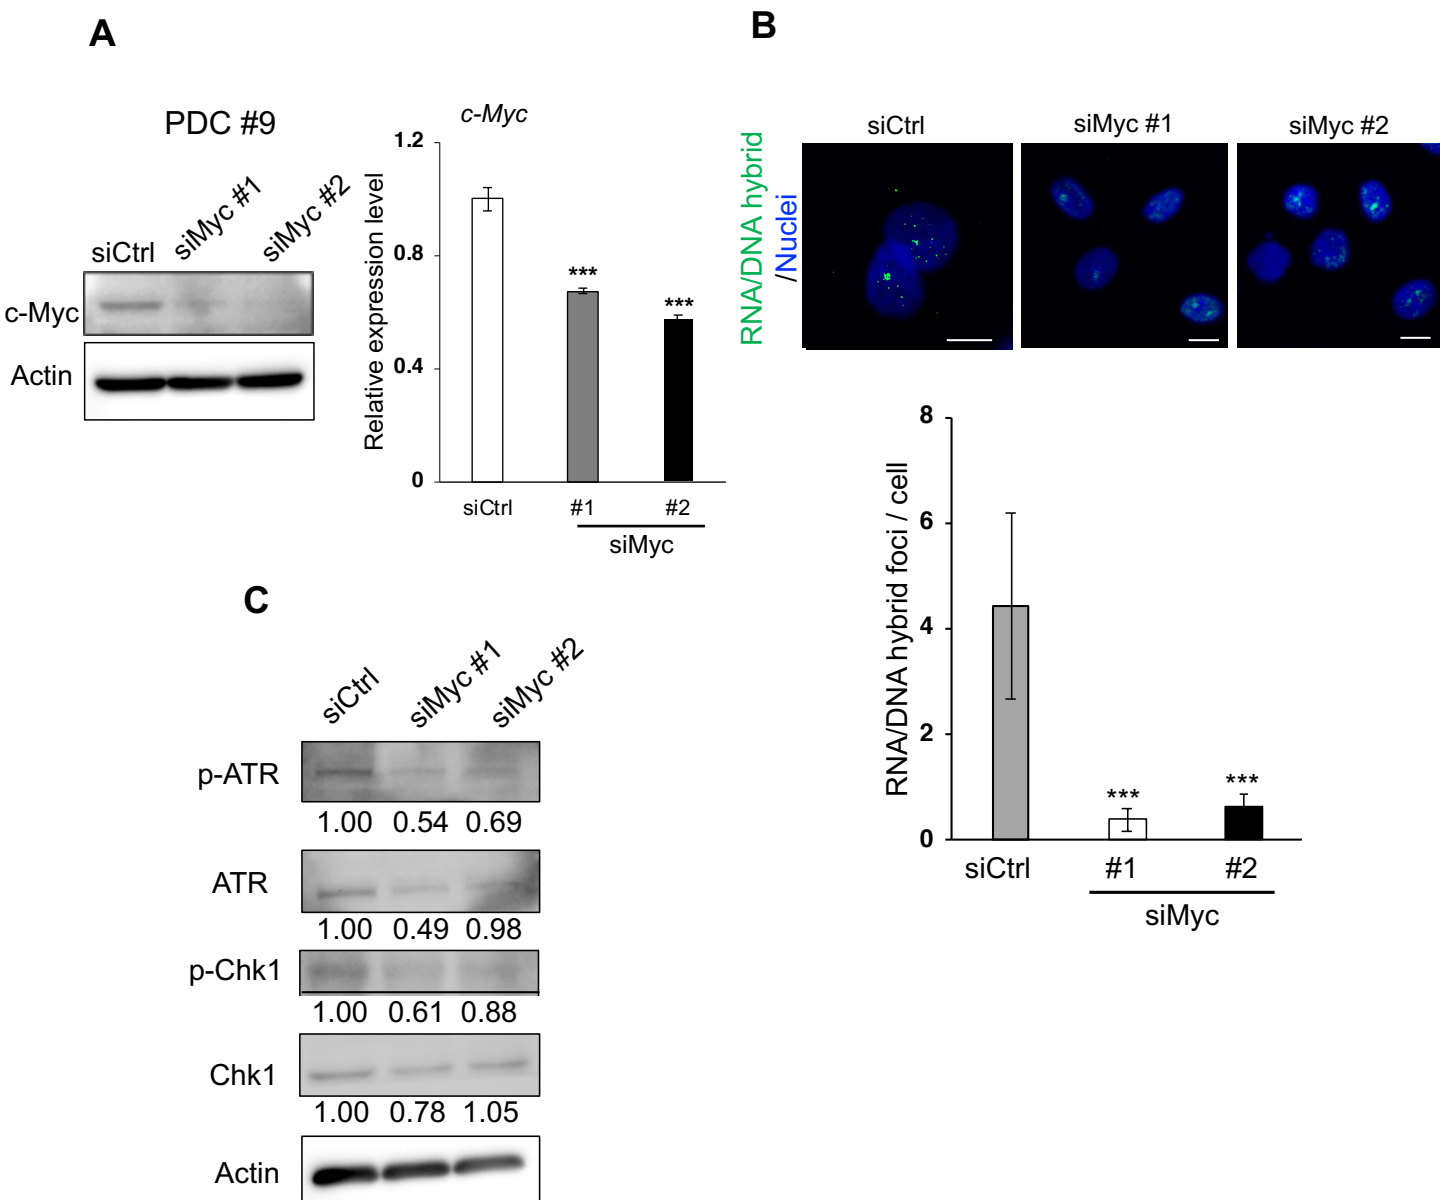

**Figure S4. *c-Myc* expression contributes to replication stress.** **A**, Knockdown efficiencies of siRNAs targeting *c-Myc* (siMyc #1 and #2) or control siRNA (siCtrl) in PDC#9 was compared by immunoblotting (left) and qPCR (right) (mean  $\pm$  SEM,  $n = 3$ ; \*\*\* $p < 0.001$ ). **B**, Number of RNA/DNA hybrid foci in each cell was counted and compared among spheroid cells treated with siCtrl, *siMyc* #1, and *siMyc* #2. Scale bar = 10  $\mu$ m. Hundred cells in each slide were counted. Three slides for each population were prepared (mean  $\pm$  SEM,  $n = 3$ ; \*\*\* $p < 0.001$ ). **C**, Expression levels of ATR, p-ATR, Chk1 and p-Chk1 as determined by immunoblotting, were compared among cells treated with siCtrl, *siMyc* #1, and *siMyc* #2. Expression was quantified by ImageJ and normalized to Actin.

### PANTHER Overrepresentation Test

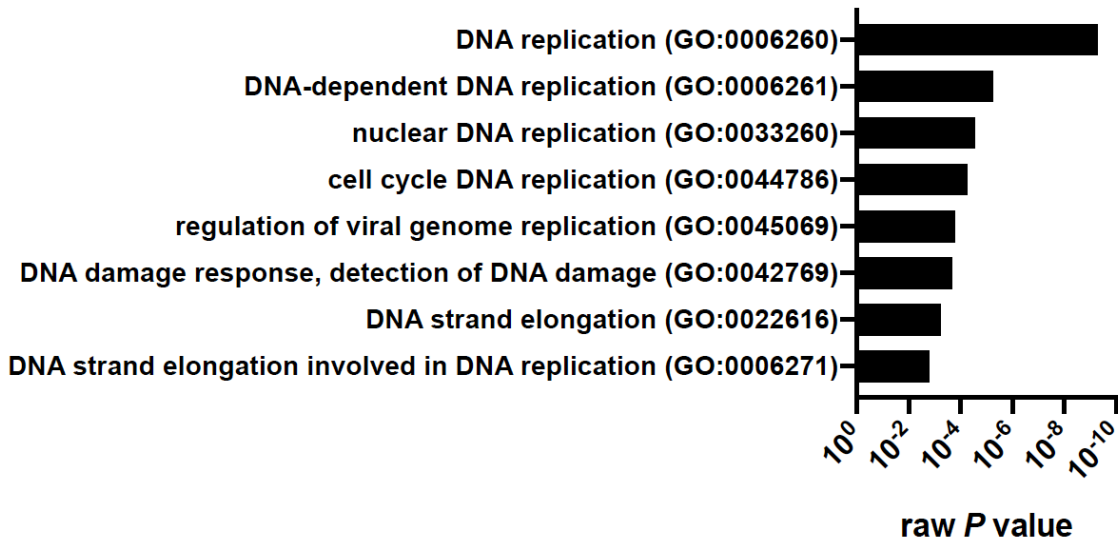

**Figure S5. Gene Ontology (GO) enrichment analysis** (<http://pantherdb.org/about.jsp>). Genes of which expression levels are >1.5 fold in spheroid cells than in adherent cells were analyzed.

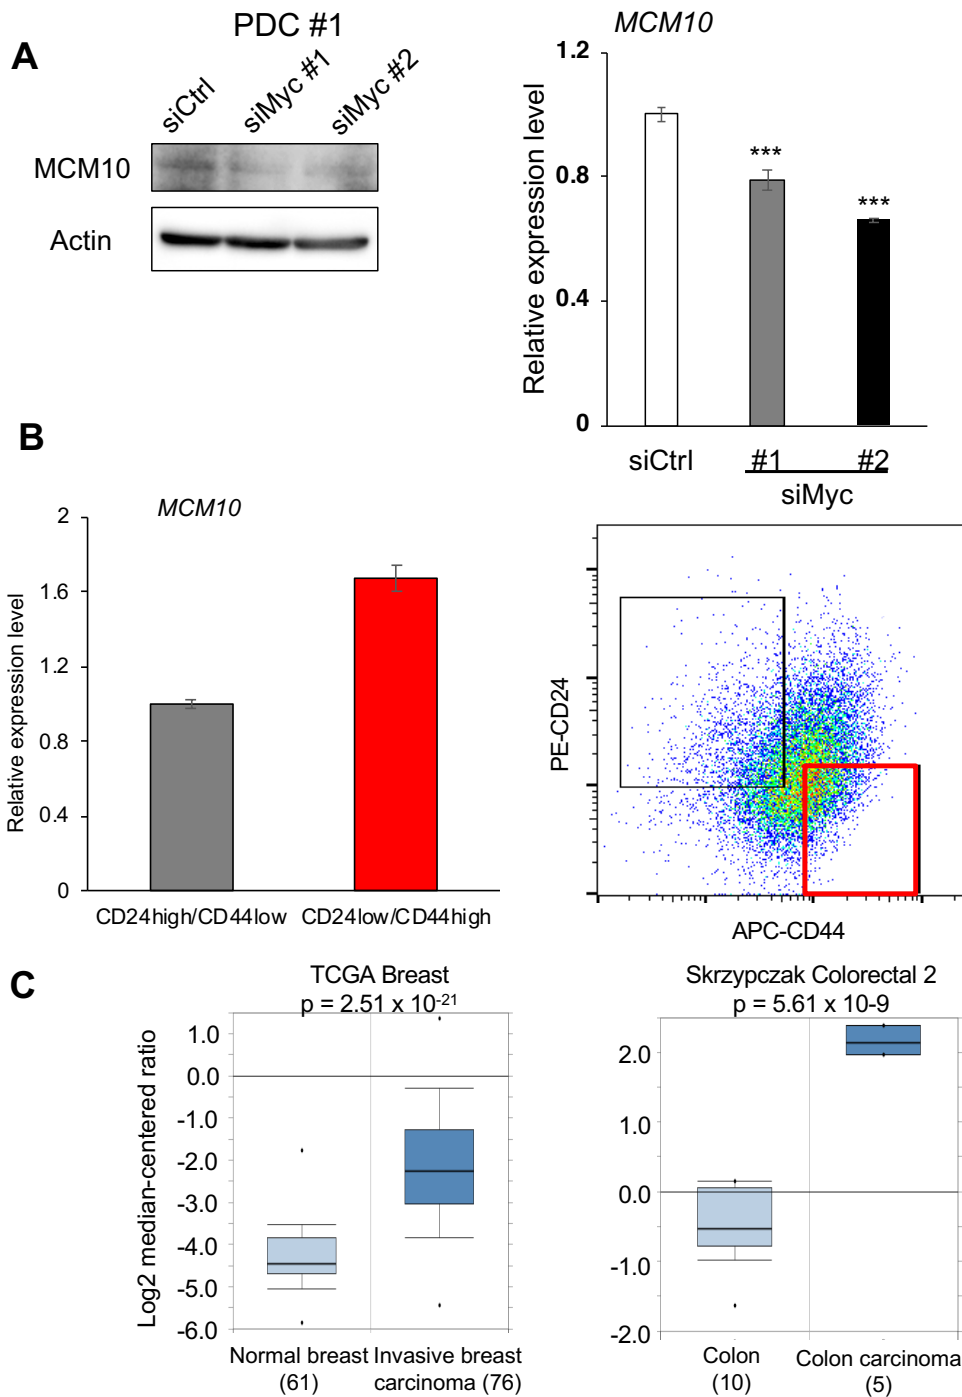

**Figure S6. MCM10 expression is associated with c-Myc expression and upregulated in cancer stem-like cells and in cancer tissues.** **A**, Expression level of MCM10 in PDC#1 in sphere conditions treated with siCtrl, *siMyc* #1 and *siMyc* #2 was compared by immunoblotting (left) and qPCR (right) (mean  $\pm$  SEM,  $n = 3$ ; \*\*\* $p < 0.001$ ). Actin was used for loading control. **B**, Expression level of *MCM10* was compared by qPCR between the CD24<sup>-low</sup>/CD44<sup>high</sup> CSC-enriched population and the CD24<sup>high</sup>/CD44<sup>low</sup> control population. The PDC #6 cells were analyzed. (mean  $\pm$  SEM,  $n = 3$ ; \* $p < 0.05$ ). **C**, *MCM10* expression was compared between non-malignant cells and cancer cells in breast and colon using the Oncomine cancer gene expression database (Left; TCGA Breast, Right; Skrzypczak Colorectal 2). P-values were calculated by Student's t-test.

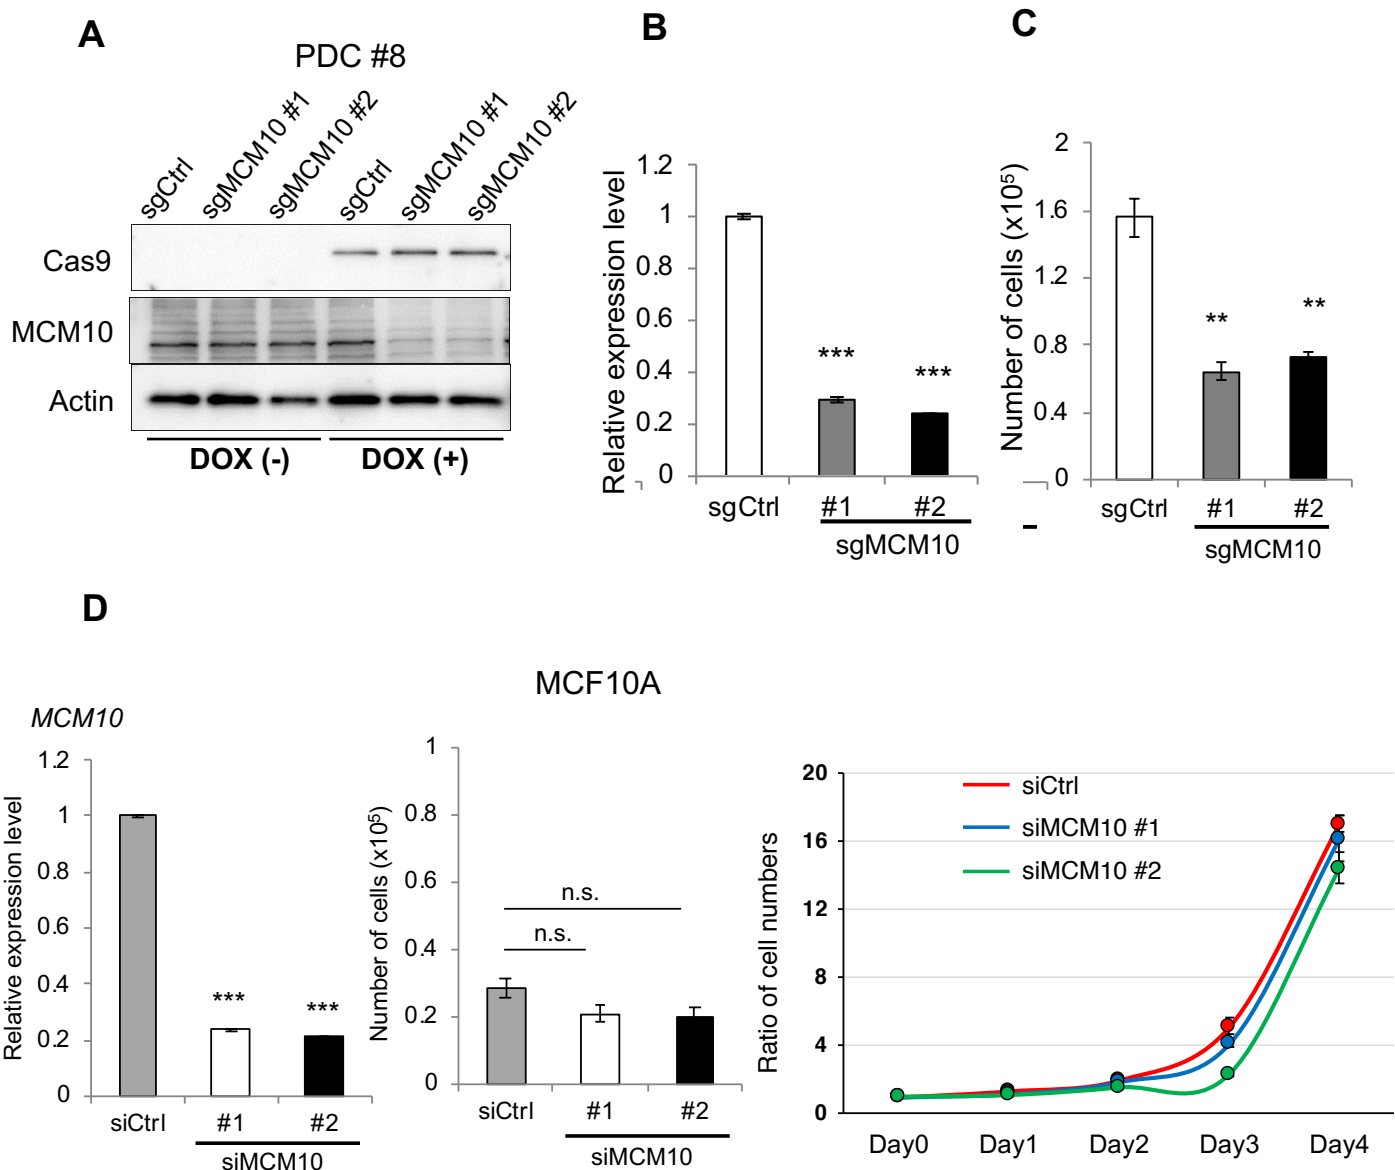

**Figure S7. MCM10 plays important roles for proliferation of cancer cells.** **A, B**, DOX-inducible knockout in PDC #8 (sgMCM10) and control cells (shCtrl) were compared by immunoblotting (**A**) and qPCR (**B**) (mean  $\pm$  SEM,  $n = 3$ ; \*\*\* $p < 0.001$ ). **C**, Cells were seeded in 12-well plates (10,000 cells/well) and cultured. Then they were harvested and counted after 4 days (mean  $\pm$  SEM,  $n = 3$ ; \*\* $p < 0.01$ ). **D**, MCF10A treated with siCtrl or *siMCM10*. Knockdown efficiencies of siRNAs (left) and cell proliferation (middle and right) were compared.

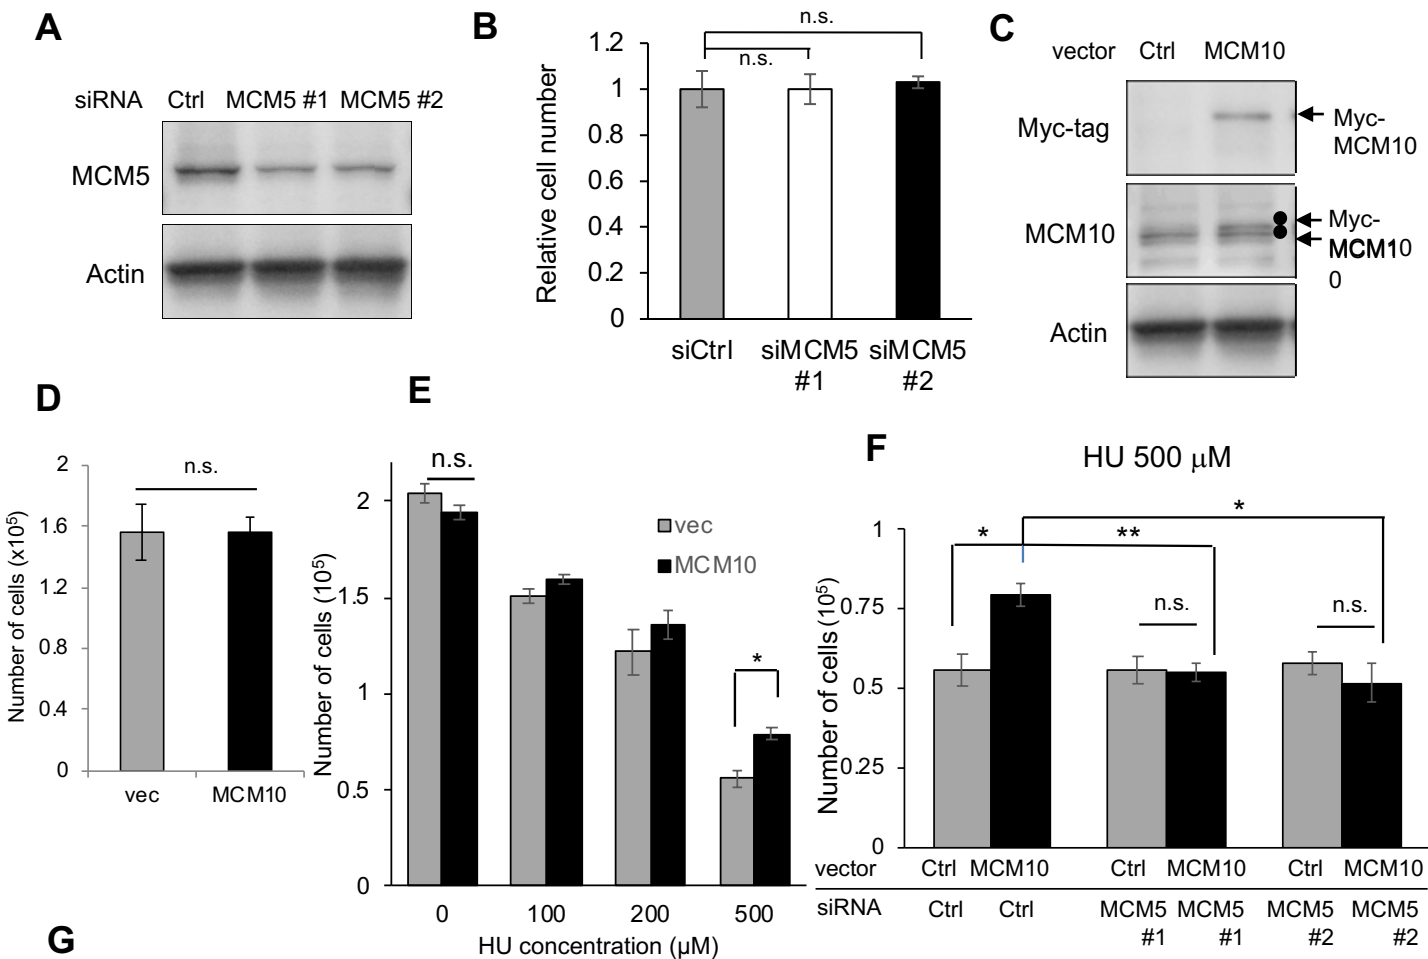

### *In vitro* limiting dilution assay

|            | Cells (per site) |     |     |     |      |      | CSC frequency | Probability (vs shCtrl) |
|------------|------------------|-----|-----|-----|------|------|---------------|-------------------------|
|            | 63               | 125 | 250 | 500 | 1000 | 2000 |               |                         |
| shCtrl     | 0/8              | 1/8 | 5/8 | 7/8 | 8/8  | 8/8  | 1/319         | -                       |
| shMCM10 #1 | 0/8              | 0/8 | 1/8 | 4/8 | 8/8  | 8/8  | 1/652         | 0.0456                  |
| shMCM10 #2 | 0/8              | 0/8 | 1/8 | 3/8 | 8/8  | 8/8  | 1/716         | 0.0241                  |

**Figure S8. MCM5 is involved in the functions of MCM10 and MCM10 plays important roles for sphere formation in vitro.** **A, B**, Expression levels of MCM5 were compared in MCF7 cells treated with siCtrl or *siMCM5* (**A**). Number of cells were counted after 4 days (mean  $\pm$  SEM, n = 3) (**B**). **C, D**, Expression levels of endogenous MCM10 and Myc-tagged MCM10, as determined by immunoblotting, were compared among cells transfected with the indicated expression vectors (**C**). Number of cells were counted after 4 days (mean  $\pm$  SEM, n = 3) (**D**).

**E, F**, MCF7 cells were transfected with the Myc-tagged MCM10 or empty vector (**E**). MCF7 cells were transfected with the Myc-tagged MCM10 or empty vector with indicated siRNAs (**F**). Cells were seeded in a 12-well plate (10,000 cells/well). Forty-eight hours later, they were treated with indicated concentrations of HU for an additional 48 h. Cells were harvested and counted (mean  $\pm$  SEM, n = 3; \*\*p < 0.01, \*p < 0.05). **G**, In vitro limiting dilution assay for MCM10-depleted cells in patient-derived breast cancer cells: 2,000, 1,000, 500, 250, 125, or 63 cells were seeded in each well of a 96-well ultra-low-attachment plates. Results were obtained 7 days after seeding. CSC frequency and p-values were determined using the ELDA software.



**A**PDC #8  
(sgRNA)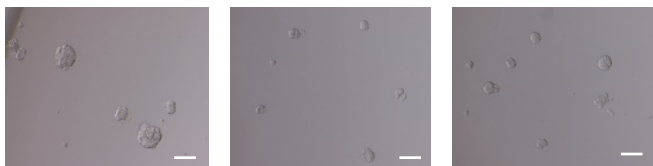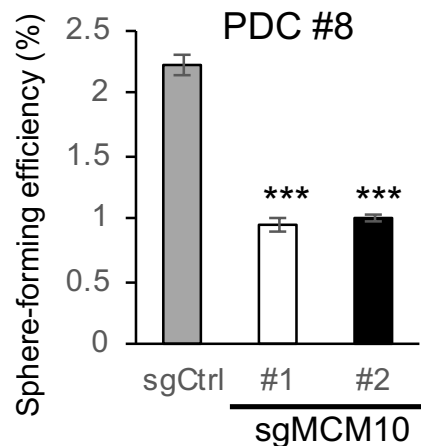**B**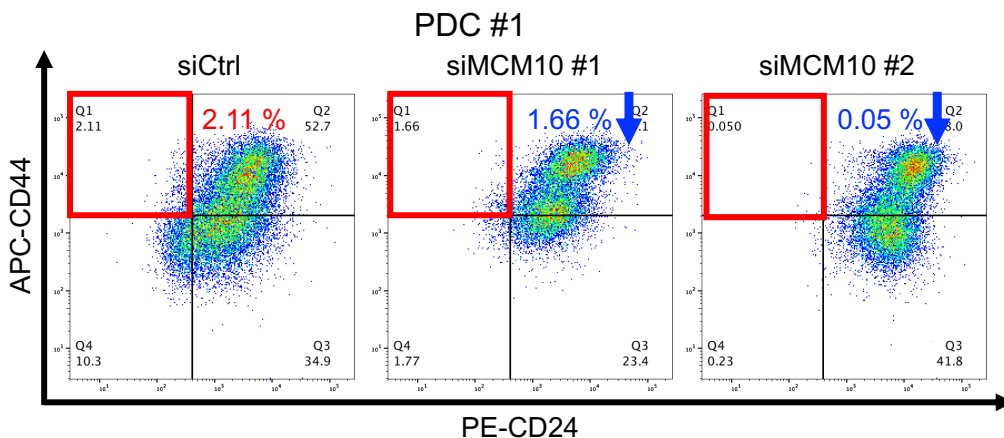

**Figure S9. MCM10 plays important roles for CSC properties.** **A** (Left) Representative images of tumor spheres. DOX-inducible *MCM10* knockout PDC #8 cells were cultured under sphere conditions. Scale bar = 100  $\mu$ m. (Right) Quantification of tumor sphere formation efficiency. Spheres were formed for 6 days (mean  $\pm$  SEM, n = 4; \*\*\*p < 0.001). **B**, PDC#1 treated with siCtrl, *siMCM10* #1 or *siMCM10* #2 were stained with CD44 and CD24 antibodies, and then subjected to flow cytometry analysis.

**Table S1.** Characteristics of clinical breast tumors used in this study

| <b>PDC (#)</b> | <b>ER</b> | <b>PgR</b> | <b>HER2</b> | <b>Molecular subtypes</b> |
|----------------|-----------|------------|-------------|---------------------------|
| <b>1</b>       | -         | -          | 0           | Triple negative           |
| <b>2</b>       | 3+        | 3+         | 2+ (FISH+)  | Luminal HER2              |
| <b>3</b>       | 3+        | -          | 3+          | Luminal HER2              |
| <b>4</b>       | -         | -          | 2+ (FISH+)  | HER2                      |
| <b>5</b>       | -         | -          | 2+ (FISH-)  | Luminal like              |
| <b>6</b>       | +         | +          | 2+ (FISH-)  | Luminal like              |
| <b>7</b>       | -         | +          | -           | Luminal like              |
| <b>8</b>       | -         | -          | -           | Ovarian cancer            |
| <b>9</b>       | +         | +          | -           | Luminal like              |

**Table S2.** Genes included in Reactome\_DNA\_Replication gene set and the ratios of expression levels of each gene, sphere cells (SPH) / adherent cells (ADH)

| Rank | Gene symbol | SPH/ADH |
|------|-------------|---------|------|-------------|---------|------|-------------|---------|------|-------------|---------|
| 1    | GMNN        | 37.044  | 51   | CENPL       | 3.325   | 101  | NSL1        | 1.746   | 151  | PSMA4       | 1.128   |
| 2    | SPC25       | 28.289  | 52   | ORC1        | 3.265   | 102  | PSMC3       | 1.743   | 152  | PSMB3       | 1.114   |
| 3    | RPS27A      | 27.516  | 53   | RFC2        | 3.244   | 103  | PSMA3       | 1.739   | 153  | CDKN1B      | 1.108   |
| 4    | PSME1       | 21.896  | 54   | PPP2R5B     | 3.204   | 104  | PMF1        | 1.733   | 154  | PPP2R5C     | 1.108   |
| 5    | MCM10       | 15.916  | 55   | CDC20       | 3.180   | 105  | RPA2        | 1.720   | 155  | PPP2CA      | 1.105   |
| 6    | CDT1        | 15.123  | 56   | MCM4        | 3.153   | 106  | PSMA5       | 1.707   | 156  | PPP2R1B     | 1.103   |
| 7    | PSMC2       | 13.974  | 57   | RANBP2      | 3.138   | 107  | PSMD11      | 1.700   | 157  | CDK2        | 1.094   |
| 8    | CENPI       | 13.831  | 58   | MCM6        | 3.083   | 108  | RPA1        | 1.698   | 158  | PPP1CC      | 1.020   |
| 9    | AURKB       | 12.728  | 59   | CENPN       | 3.048   | 109  | CENPT       | 1.646   | 159  | MAD1L1      | 0.989   |
| 10   | CDC6        | 12.029  | 60   | PPP2R5A     | 2.991   | 110  | PSMB7       | 1.645   | 160  | PPP2R5D     | 0.896   |
| 11   | BIRC5       | 9.943   | 61   | INCENP      | 2.967   | 111  | PSMD12      | 1.644   | 161  | PSMD3       | 0.885   |
| 12   | GENS2       | 9.823   | 62   | MCM7        | 2.926   | 112  | PSMD1       | 1.634   | 162  | PSMB4       | 0.880   |
| 13   | SKA1        | 9.493   | 63   | POLD3       | 2.837   | 113  | PSMA2       | 1.616   | 163  | MAPRE1      | 0.868   |
| 14   | NDC80       | 9.282   | 64   | CASC5       | 2.796   | 114  | PAFAH1B1    | 1.608   | 164  | PSMB10      | 0.844   |
| 15   | CENPM       | 8.938   | 65   | PSMA1       | 2.785   | 115  | PSMD6       | 1.595   | 165  | KIF2A       | 0.822   |
| 16   | ERCC6L      | 8.639   | 66   | KIF20A      | 2.776   | 116  | POLD2       | 1.564   | 166  | KNTC1       | 0.814   |
| 17   | PSMD9       | 8.307   | 67   | RAD21       | 2.735   | 117  | PSMA7       | 1.533   | 167  | E2F3        | 0.773   |
| 18   | NUF2        | 7.717   | 68   | DNA2        | 2.724   | 118  | RFC4        | 1.528   | 168  | PSMD5       | 0.768   |
| 19   | CDC45       | 7.440   | 69   | LIG1        | 2.710   | 119  | POLA2       | 1.519   | 169  | STAG2       | 0.766   |
| 20   | KIF2C       | 7.041   | 70   | CENPP       | 2.706   | 120  | CLIP1       | 1.509   | 170  | POLD4       | 0.695   |
| 21   | NUDC        | 7.037   | 71   | SKA2        | 2.696   | 121  | PSME2       | 1.509   | 171  | SEH1L       | 0.626   |
| 22   | PRIM1       | 6.714   | 72   | SPC24       | 2.657   | 122  | POLE2       | 1.489   | 172  | PSMB2       | 0.624   |
| 23   | ZWINT       | 6.504   | 73   | PPP2CB      | 2.635   | 123  | PSMB1       | 1.467   | 173  | PSMC6       | 0.610   |
| 24   | CDCA8       | 6.473   | 74   | MAD2L1      | 2.634   | 124  | UBA52       | 1.466   | 174  | RFC5        | 0.548   |
| 25   | CENPK       | 6.246   | 75   | FBXO5       | 2.612   | 125  | CCNA2       | 1.461   | 175  | PSME4       | 0.533   |
| 26   | MLF1IP      | 5.954   | 76   | CDKN1A      | 2.611   | 126  | PSMB5       | 1.451   | 176  | RCC2        | 0.502   |
| 27   | ZWILCH      | 5.924   | 77   | RPA3        | 2.554   | 127  | ORC4        | 1.405   | 177  | CKAP5       | 0.496   |
| 28   | KIF18A      | 5.346   | 78   | CCNA1       | 2.552   | 128  | PSMD14      | 1.402   | 178  | NDEL1       | 0.472   |
| 29   | GENS1       | 5.281   | 79   | CENPO       | 2.513   | 129  | PSMD8       | 1.377   | 179  | CLASP1      | 0.438   |
| 30   | FEN1        | 5.251   | 80   | DSN1        | 2.460   | 130  | ORC3        | 1.366   | 180  | RANGAP1     | 0.436   |
| 31   | E2F1        | 4.845   | 81   | MCM3        | 2.456   | 131  | PSMB8       | 1.352   | 181  | CENPC1      | 0.417   |
| 32   | GORASP1     | 4.819   | 82   | NUP85       | 2.418   | 132  | PSMD13      | 1.344   | 182  | B9D2        | 0.320   |
| 33   | CENPA       | 4.714   | 83   | PSMF1       | 2.379   | 133  | PSMD2       | 1.336   | 183  | PSMC1       | 0.121   |
| 34   | PLK1        | 4.472   | 84   | DBF4        | 2.332   | 134  | MIS12       | 1.320   | 184  | RPS27       | 0.020   |
| 35   | SGOL2       | 4.429   | 85   | MCM8        | 2.249   | 135  | XPO1        | 1.316   |      |             |         |
| 36   | BUB1        | 4.375   | 86   | POLE        | 2.223   | 136  | PSMD4       | 1.282   |      |             |         |
| 37   | E2F2        | 4.169   | 87   | PSMC4       | 2.145   | 137  | GENS4       | 1.275   |      |             |         |
| 38   | ITGB3BP     | 4.135   | 88   | SEC13       | 2.123   | 138  | NUP107      | 1.271   |      |             |         |
| 39   | TAOK1       | 3.893   | 89   | MCM2        | 2.109   | 139  | CENPH       | 1.269   |      |             |         |
| 40   | PCNA        | 3.872   | 90   | STAG1       | 1.914   | 140  | PSMA6       | 1.253   |      |             |         |
| 41   | ORC6        | 3.823   | 91   | PSMA8       | 1.895   | 141  | ORC5        | 1.211   |      |             |         |
| 42   | SMC3        | 3.778   | 92   | PPP2R1A     | 1.836   | 142  | ZW10        | 1.187   |      |             |         |
| 43   | MCM5        | 3.717   | 93   | NUP133      | 1.833   | 143  | PRIM2       | 1.182   |      |             |         |
| 44   | CENPQ       | 3.709   | 94   | SMC1A       | 1.804   | 144  | PSMB9       | 1.167   |      |             |         |
| 45   | SGOL1       | 3.628   | 95   | PSMC5       | 1.799   | 145  | PSMB6       | 1.157   |      |             |         |
| 46   | RFC3        | 3.606   | 96   | PPP2R5E     | 1.790   | 146  | NUP43       | 1.156   |      |             |         |
| 47   | CDC7        | 3.542   | 97   | ORC2        | 1.776   | 147  | POLA1       | 1.147   |      |             |         |
| 48   | KIF23       | 3.485   | 98   | PSMD10      | 1.773   | 148  | PSMD7       | 1.138   |      |             |         |
| 49   | APITD1      | 3.353   | 99   | NUP37       | 1.771   | 149  | RB1         | 1.131   |      |             |         |
| 50   | BUB1B       | 3.351   | 100  | BUB3        | 1.767   | 150  | AHCTF1      | 1.129   |      |             |         |
